# Supplementary material
Source: PubMed Central journal article supplement (PMC5123748)
Supplement: NIHMS819979-supplement-Supplemental_figures.pdf [file NIHMS819979-supplement-Supplemental_figures.pdf]

# **Small GTPase ARF6 Regulates Endocytic Pathway Leading to Degradation of ATP Binding Cassette Transporter A1**

Nigora Mukhamedova, Anh Hoang, Huanhuan L. Cui, Irena Carmichael, Ying Fu, Michael Bukrinsky, Dmitri Sviridov

**Supplement Material:**

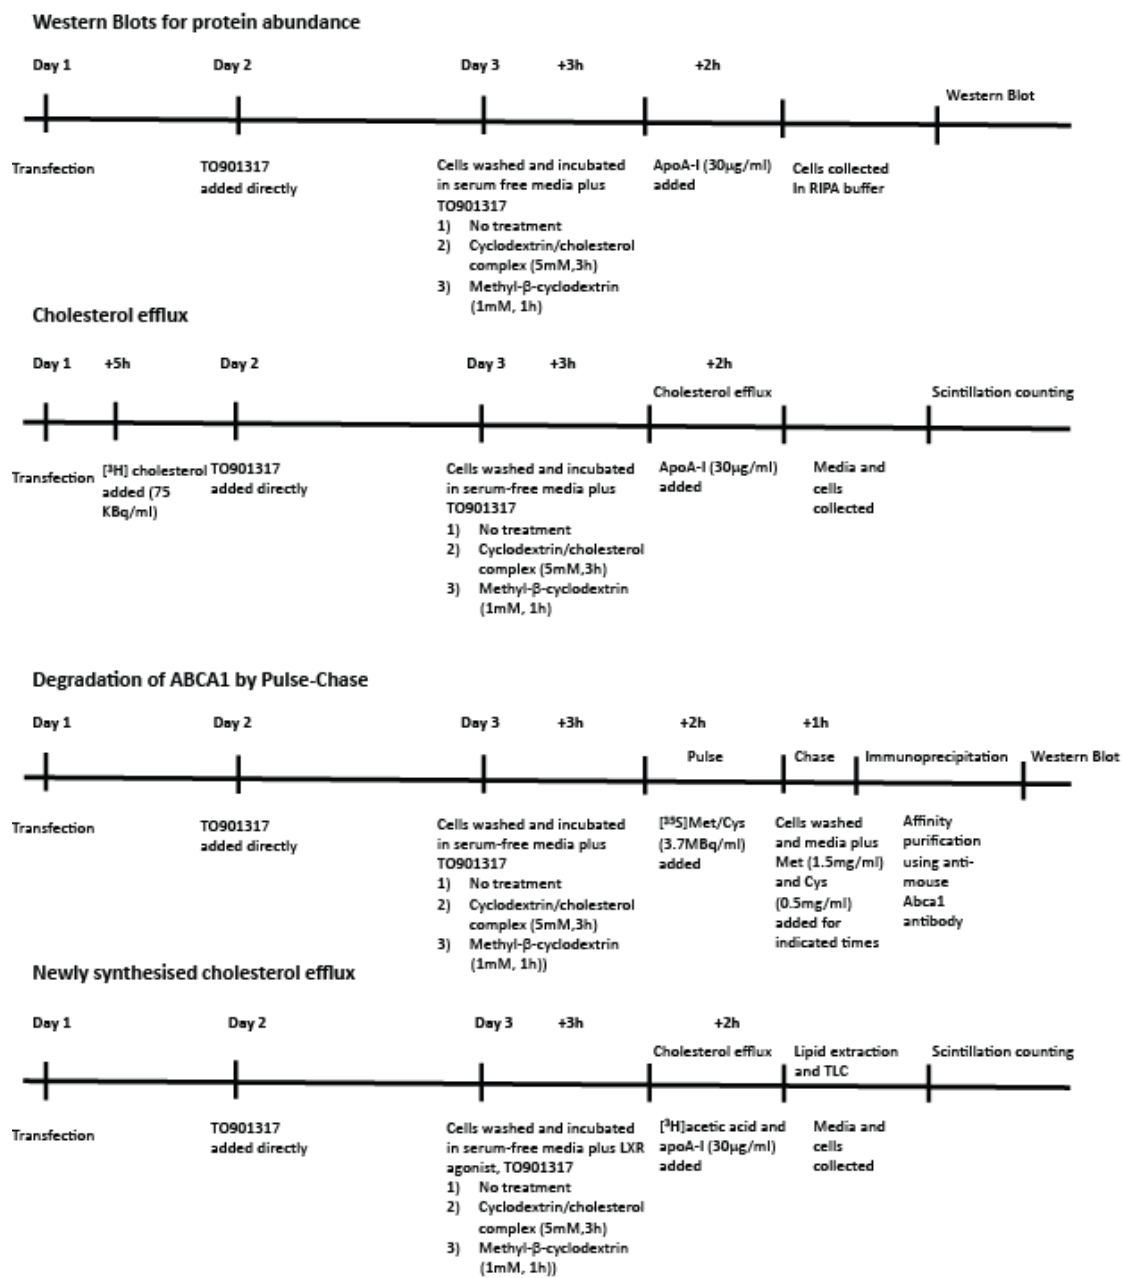

**Supplemental Figure I: Schematic representation of the experimental design**

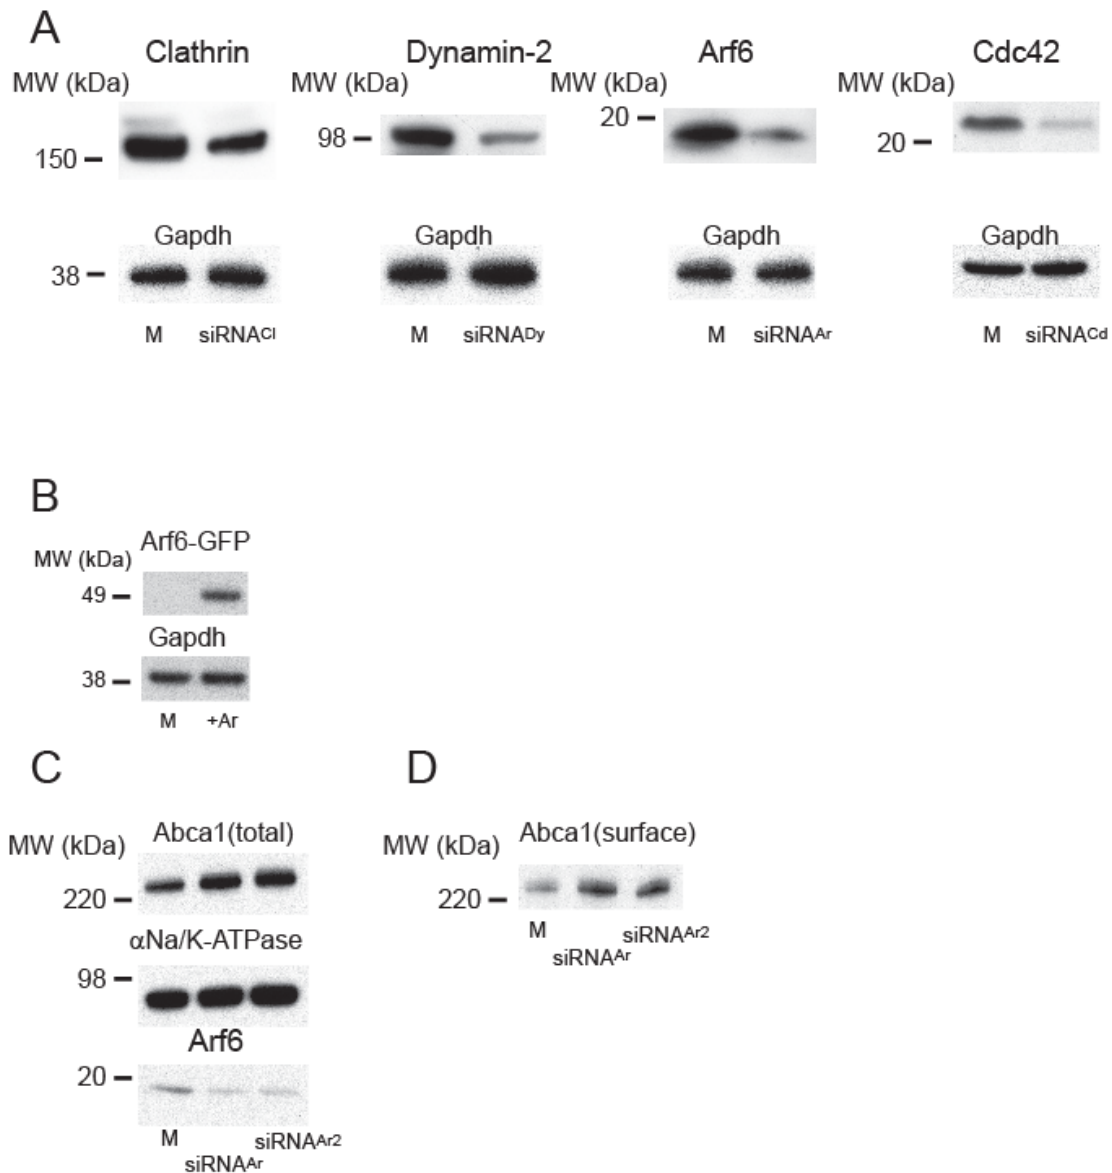

### Supplemental Figure II: Silencing and overexpression of elements of endocytic pathways

**A** – The abundance of clathrin (Cl), dynamin-2 (Dy), Arf6 (Ar) or Cdc42 (Cd) in mock-transfected cells (M) and cells where these proteins were silenced by transfection with corresponding siRNA (siRNA).

**B** – The abundance of Arf6 in cells transiently transfected with Arf6 (+Ar) or mock (M) plasmid.

**C** - The abundance of Arf6 and total Abca1 in cells after transfection with original (siRNA<sup>Ar</sup>) or alternative (siRNA<sup>Ar2</sup>) siRNA.

**D** - The abundance of cell-surface Abca1 in cells after transfection with original (siRNA<sup>Ar</sup>) or alternative (siRNA<sup>Ar2</sup>) siRNA.

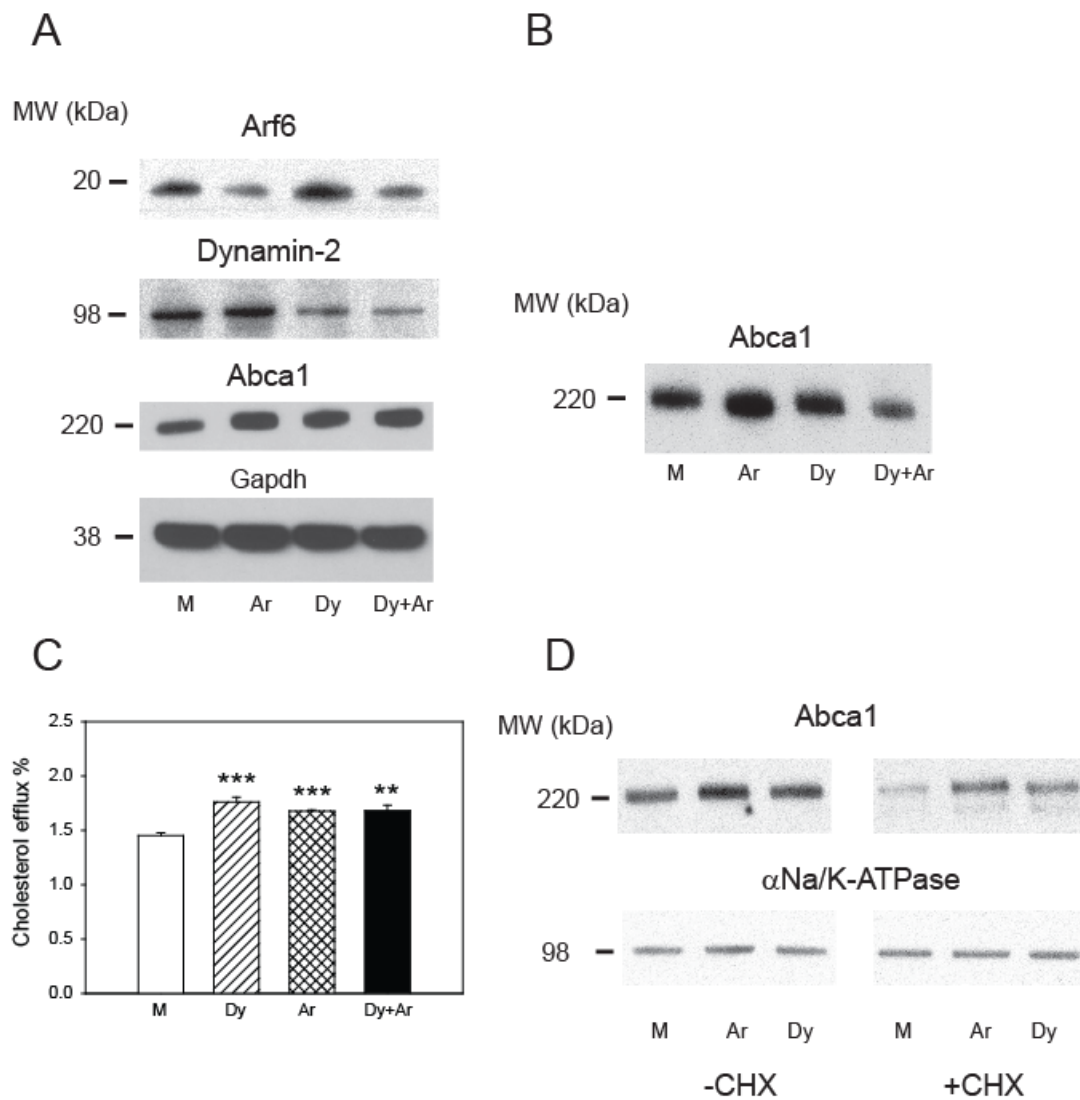

**Supplemental Figure III. The effect of co-silencing of Arf6 and Dynamin-2 on ABCA1 abundance and functionality (A-C). The effect of cycloheximide on regulation of Abca1 abundance by Arf6 and Dynamin-2 (D).**

**A** – The abundance of Arf6, Dynamin-2 and total Abca1 in cells with silenced Arf6 (Ar), dynamin-2 (Dy) or both dynamin-2 and Arf6.

**B** – The abundance of cell-surface Abca1 in cells with silenced Arf6 (Ar), dynamin-2 (Dy) or both dynamin-2 and Arf6.

**C** - Cholesterol efflux to apoA-I (final concentration 30  $\mu$ g/ml) from cells with silenced Arf6 (Ar), dynamin-2 (Dy) or both dynamin-2 and Arf6. Means  $\pm$  SEM of quadruplicate determinations are shown. \*\* $p$  < 0.01, \*\*\* $p$  < 0.001.

**D** - The abundance of total Abca1 in cells with silenced Arf6 (Ar) or dynamin-2 (Dy) in the presence or absence of cycloheximide (CHX, 5  $\mu$ g/ml).

A

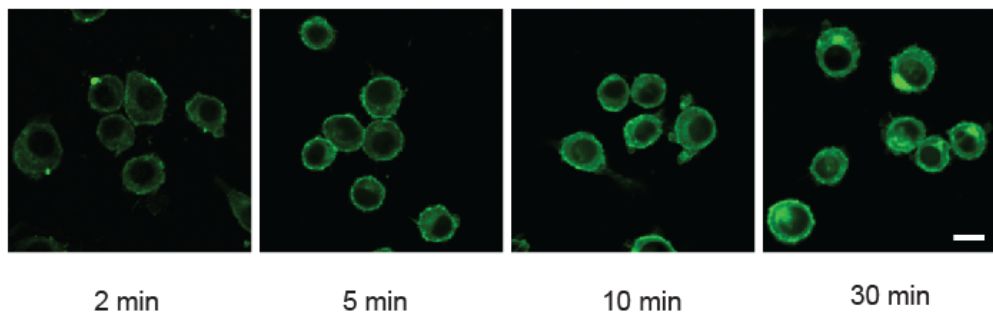

B

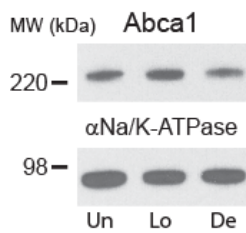

C

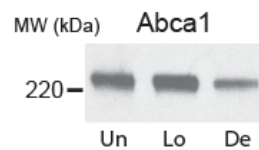

D

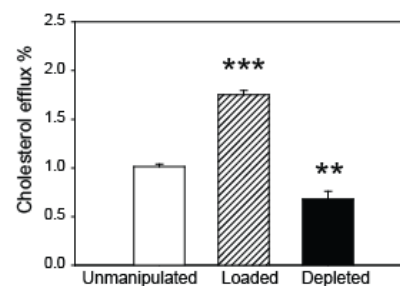

E

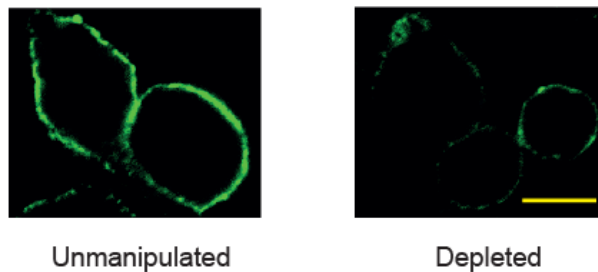

**Supplemental Figure IV. The effects of cholesterol-loading and cholesterol-depletion on intracellular cholesterol distribution, Abca1 abundance and cholesterol efflux.**

**A** – Time-course of cellular distribution of cholesterol after loading of cells with methyl- $\beta$ -cyclodextrin/BODIPY-cholesterol complex. Bar 10  $\mu$ m.

**B, C** - The abundance of total (B) and cell-surface (C) Abca1 in cells after cholesterol-loading (Lo) or cholesterol-depletion (De) as compared to cells with unmanipulated cholesterol content (Un).

**D** – Cholesterol efflux from cells after cholesterol-loading or cholesterol-depletion as compared to cells with unmanipulated cholesterol content.

**E** - The abundance of lipid rafts in cells with unmanipulated cholesterol content and cholesterol-depleted cells. Bar 10  $\mu$ m.

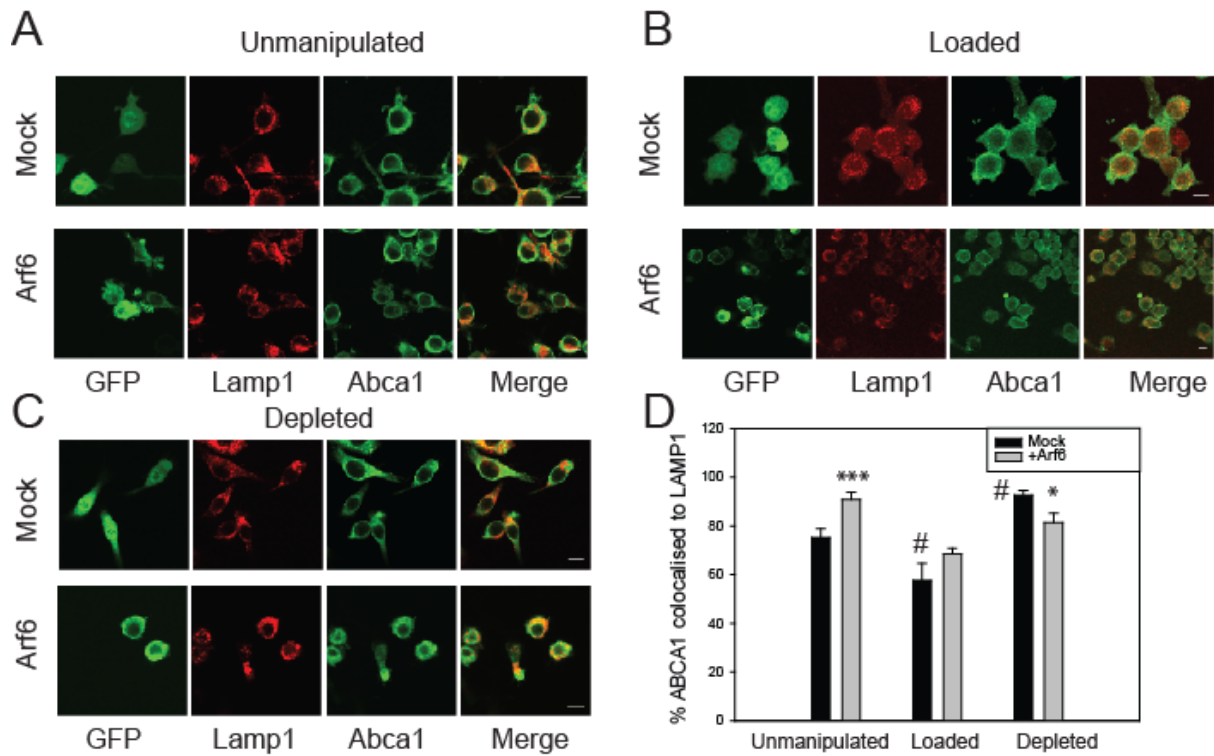

**Supplemental Figure V: The effect of overexpression of Arf6 on co-localization of Abca1 and Lamp1.**

**A** – Confocal microscopy analysis of co-localization of Abca1 and Lamp1 in cells with unmanipulated cholesterol content transiently transfected with Arf6 or mock plasmid. Left column shows cells expressing GFP (transfected cells); colour for detection of Abca1 was changed to green for visualization of co-localization. Bar 10  $\mu$ m.

**B** – Confocal microscopy analysis of co-localization of Abca1 and Lamp1 in cholesterol-loaded cells transiently transfected with Arf6 or mock plasmid. Left column shows cells expressing GFP (transfected cells); colour for detection of Abca1 was changed to green for visualization of co-localization. Bar 10  $\mu$ m.

**C** – Confocal microscopy analysis of co-localization of Abca1 and Lamp1 in cholesterol-depleted cells transiently transfected with Arf6 or mock plasmid. Left column shows cells expressing GFP (transfected cells); colour for detection of Abca1 was changed to green for visualization of co-localization. Bar 10  $\mu$ m.

**D** - Quantitation of co-localization of Abca1 and Lamp1 from images shown in F-H (Means  $\pm$  SEM for 50-70 cells for each bar).

\* $p < 0.05$ , \*\*\* $p < 0.001$  (*versus* mock transfected cells with the same treatment); # $p < 0.01$  (*versus* unmanipulated mock transfected cells)

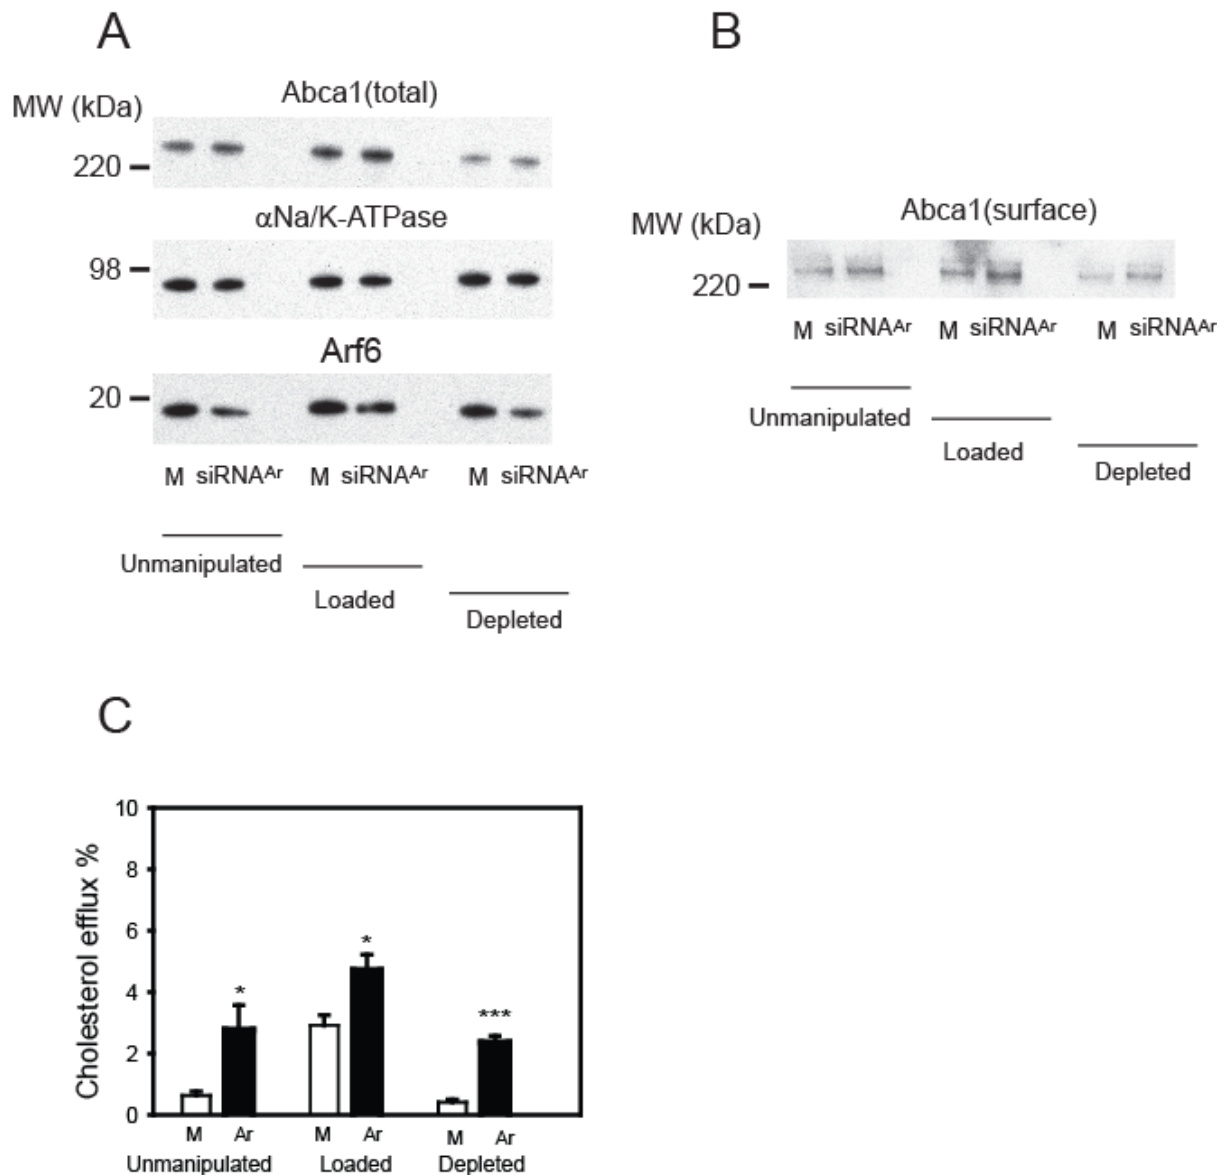

**Supplemental Figure VI. The effect of silencing of Arf6 on the abundance of Abca1 and cholesterol efflux from bone marrow derived macrophages.**

**A** - The abundance of Arf6 and total Abca1 in BMDM with unmanipulated cholesterol content or after cholesterol-loading or cholesterol-depletion, and after transfection with siRNA<sup>Ar</sup>.

**B** - The abundance of cell-surface Abca1 in BMDM with unmanipulated cholesterol content or after cholesterol-loading or cholesterol-depletion, and after transfection with siRNA<sup>Ar</sup>.

**C** - Cholesterol efflux from BMDM with unmanipulated cholesterol content or after cholesterol-loading or cholesterol-depletion, and after transfection with siRNA<sup>Ar</sup>.
