# Supplementary material
Source: PubMed Central journal article supplement (PMC5123748)

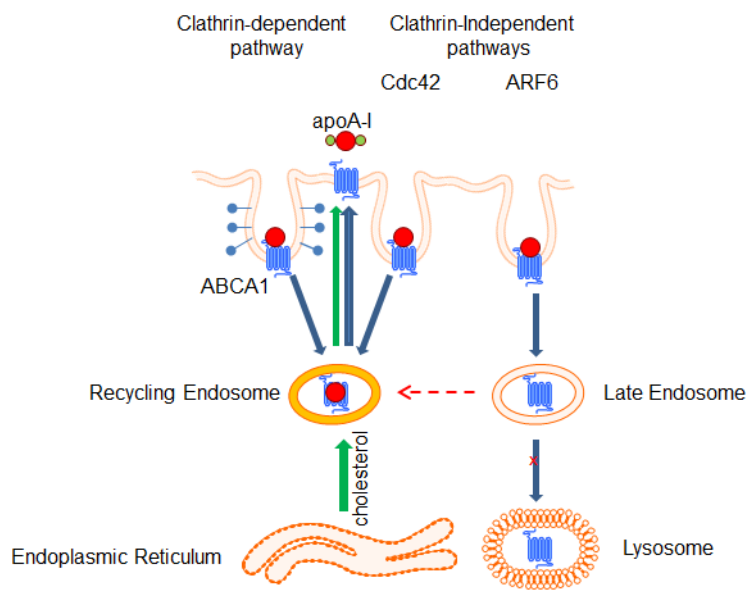

Supplement: NIHMS819979-supplement-Graphic_Abstract.pdf [file NIHMS819979-supplement-Graphic_Abstract.pdf]
